# Supplementary material for: Effects of Mini-Dystrophin on Dystrophin-Deficient, Human Skeletal Muscle-Derived Cells
Source: PubMed Central journal article supplement (PMC7582244; doi:10.3390/ijms21197168), 2020-09-28
Supplement: ijms-21-07168-s001.pdf [file ijms-21-07168-s001.pdf]

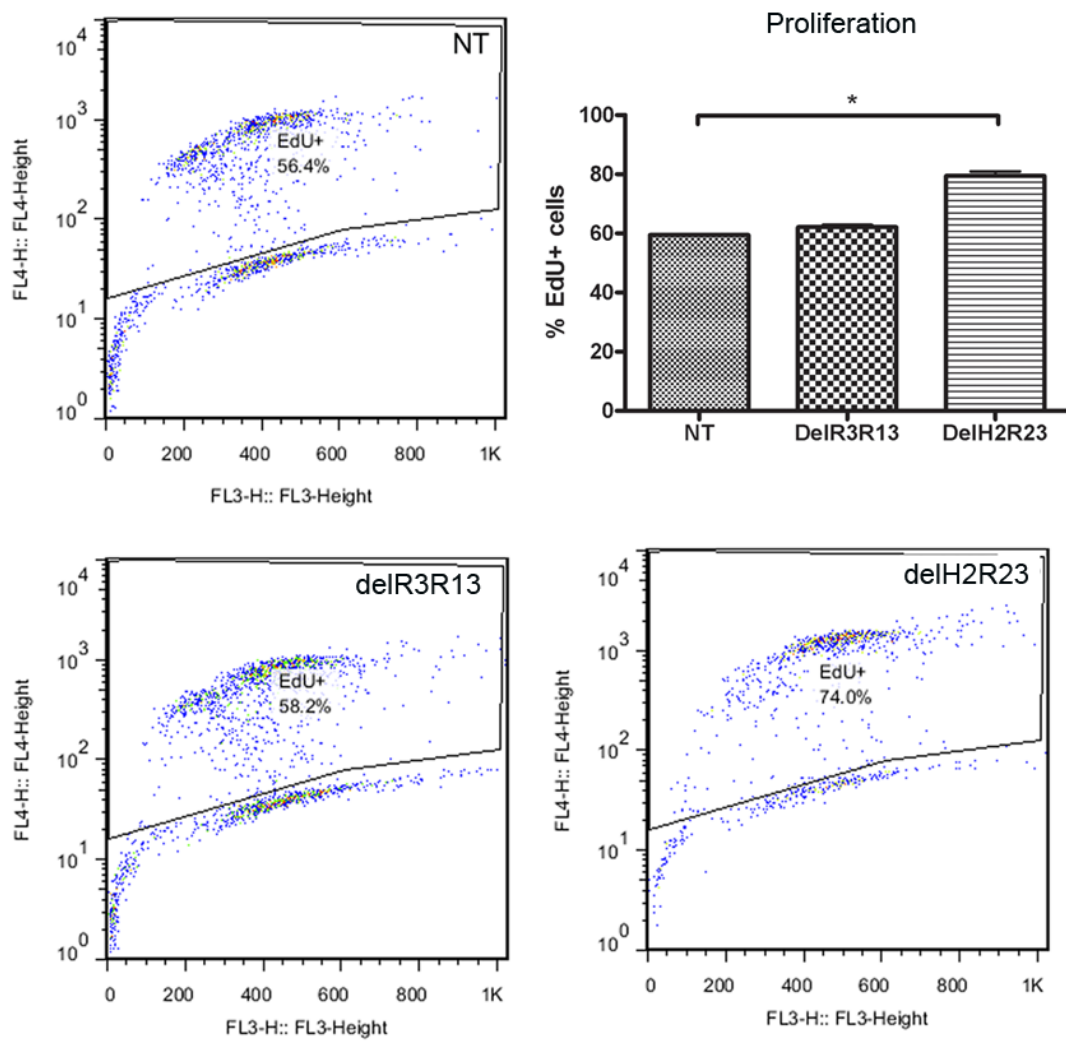

Figure S1. Effects on cell proliferation after cells were transduced with mini-dystrophin lentivirus driven by the human desmin promoter. Similar to cells transfected by SFFV-driven lentiviruses, mini-dystrophin  $\Delta$ R3R13 has no effect on cell proliferation, while  $\Delta$ H2R23 significantly increased the proliferation of human muscle-derived cells.
